# Supplementary material for: Variation of BMP3 Contributes to Dog Breed Skull Diversity
Source: PLoS Genet. 2012 Aug 2;8(8):e1002849. doi: 10.1371/journal.pgen.1002849 (PMC3410846; doi:10.1371/journal.pgen.1002849)
Supplement: Table S3 — CanMap genotype profiles used in skull shape GWAS. The genotypes from a total of 576 CanMap dogs (105 breed-sex combinations) were matched with PC1 breed-sex phenotypes. For 75 CanMap breed-sex combinations, PC1 traits were assigned breed-sex averages. The remaining 30 breed-sex assignments were made based on PC1 data that was derived from a single breed-sex representative. Of the 30 breeds with assigned PC1 values based on single skull representatives, 17 of these had PC1 breed-sex averages for the opposite sex. Nineteen CanMap breeds used genotype data from only one sex, as craniometric data for the opposite sex was unavailable. Asterisks indicate CanMap breeds falling within the 1st and 2nd breed-sex log(neurocranium centroid) quartiles that were used in stratified analysis (Figure 2C). (XLSX) [file pgen.1002849.s009.xlsx]

## Sheet: Sheet1
Breed	Abbreviation	Sex	N	Single Skull Phenotype Assignment?	Size Quartile
American Cocker Spaniel	ACKR	male	7	yes	2
American Cocker Spaniel	ACKR	female	5	yes	1
Afghan Hound	AFGH	male	5		2
Afghan Hound	AFGH	female	5	yes	3
Alaskan Malamute	AMAL	male	5		4
Alaskan Malamute	AMAL	female	6	yes	4
Australian Shepherd	AUSS	female	7	yes	2
Australian Terrier	AUST	female	5	yes	1
Basset Hound	BASS	female	8	yes	2
Beagle	BEAG	female	7		1
Bloodhound	BLDH	male	5	yes	4
Bloodhound	BLDH	female	4		3
Bernese Mountain Dog	BMD-	male	4		4
Bernese Mountain Dog	BMD-	female	7		4
Border Collie	BORD	male	5	yes	3
Borzoi	BORZ	male	7		4
Borzoi	BORZ	female	5		3
Boston Terrier	BOST	male	1		1
Boston Terrier	BOST	female	5		1
Boxer	BOX-	male	2		3
Boxer	BOX-	female	9		3
Briard	BRIA	male	2	yes	4
Briard	BRIA	female	10		4
Brussels Griffon	BRUS	female	5		1
Bulldog	BULD	male	3	yes	2
Bulldog	BULD	female	5		2
Bull Terrier	BULT	female	3		3
Cairn Terrier	CAIR	male	3	yes	1
Chihuahua	CHIH	male	2		1
Chihuahua	CHIH	female	7		1
Chow Chow	CHOW	male	2		2
Chow Chow	CHOW	female	9		2
Cavalier King Charles Spaniel	CKCS	female	7	yes	1
Collie	COLL	male	7		3
Collie	COLL	female	5		2
Dachshund	DACH	male	6	yes	2
Dachshund	DACH	female	6		1
Great Dane	DANE	male	3		4
Great Dane	DANE	female	9		4
Scottish Deerhound	DEER	male	6	yes	4
Dobermann Pinscher	DOBP	male	5		3
Dobermann Pinscher	DOBP	female	6		3
English Cocker Spaniel	ECKR	male	1		2
English Cocker Spaniel	ECKR	female	5	yes	1
English Springer Spaniel	ESSP	male	7	yes	2
English Springer Spaniel	ESSP	female	3	yes	2
French Bulldog	FBUL	male	5		1
French Bulldog	FBUL	female	7		1
Golden Retriever	GOLD	male	3		3
Golden Retriever	GOLD	female	9		3
Greyhound	GREY	male	7		3
Greyhound	GREY	female	5		3
German Shepherd	GSD-	male	4		3
German Shepherd	GSD-	female	8		3
German Short-Haired Pointer	GSHP	male	6	yes	3
German Short-Haired Pointer	GSHP	female	5		2
Giant Schnauzer	GSNZ	male	5		4
Giant Schnauzer	GSNZ	female	7		4
Siberian Husky	HUSK	male	4		3
Siberian Husky	HUSK	female	8		3
Ibizan Hound	IBIZ	female	7	yes	3
Italian Greyhound	ITGY	male	3		1
Italian Greyhound	ITGY	female	9		1
Irish Wolfhound	IWOF	male	9		4
Irish Wolfhound	IWOF	female	4		4
Jack Russel Terrier	JACK	male	5	yes	1
Kuvasz	KUVZ	male	7		4
Labrador Retriever	LAB-	male	7		3
Labrador Retriever	LAB-	female	5		3
Mastiff	MAST	male	4		4
Mastiff	MAST	female	8	yes	4
Newfoundland	NEWF	male	7		4
Newfoundland	NEWF	female	5		4
Norwich Terrier	NOWT	male	5		1
Norwich Terrier	NOWT	female	4	yes	1
Old English Sheepdog	OES-	male	4	yes	4
Pekingese	PEKE	male	7		1
Pekingese	PEKE	female	4	yes	1
Pembroke Welsh Corgi	PEMB	male	6		2
Pembroke Welsh Corgi	PEMB	female	5		1
Pomeranian	POM-	male	2		1
Pomeranian	POM-	female	10	yes	1
Pug	PUG-	male	6		1
Pug	PUG-	female	6		1
Rottweiler	ROTT	male	7		4
Rottweiler	ROTT	female	5		4
Saluki	SALU	female	4	yes	2
Samoyed	SAMO	male	4		3
Samoyed	SAMO	female	2		2
Scottish Terrier	SCOT	male	8		2
Scottish Terrier	SCOT	female	4		2
Shar Pei	SHAR	female	6		2
Shih Tzu	SHIH	male	4		1
Shih Tzu	SHIH	female	6		1
Standard Poodle	SPOO	male	6		2
Standard Poodle	SPOO	female	6		2
Shetland Sheepdog	SSHP	male	6	yes	1
Shetland Sheepdog	SSHP	female	6	yes	1
Standard Schnauzer	SSNZ	female	5		2
St. Bernard Dog	STBD	male	3		4
St. Bernard Dog	STBD	female	9		4
Toy Poodle	TPOO	female	4	yes	1
Whippet	WHIP	female	6		2
West Highland White Terrier	WHWT	male	9		1
West Highland White Terrier	WHWT	female	3		1

## Sheet: Sheet2
Id	Centroid	Size	quartile
ACKR_2	128.958	4.85948	1
AUST_2	128.969	4.85957	1
BEAG_2	122.818	4.80863	1
BORT_2	124.608	4.8251	1
BOST_1	111.743	4.71533	1
BOST_2	115.365	4.74749	1
BRUS_2	108.94	4.68927	1
CAIR_1	121.809	4.80245	1
CHIH_1	97.6788	4.58089	1
CHIH_2	94.9341	4.55282	1
CKCS_2	119.291	4.78157	1
CRES_2	105.644	4.65941	1
DACH_2	115.63	4.7502	1
ECKR_2	125.417	4.83164	1
ETOY_1	113.401	4.73093	1
ETOY_2	107.821	4.68035	1
FBUL_1	132.306	4.88498	1
FBUL_2	124.977	4.82762	1
FOXT_1	125.991	4.83599	1
FOXT_2	124.22	4.82201	1
GPIN_2	132.08	4.88341	1
ITGY_1	106.423	4.66738	1
ITGY_2	103.831	4.64266	1
JACK_1	112.656	4.72434	1
LHSA_1	132.163	4.88403	1
LUND_1	124.341	4.82303	1
LUND_2	115.763	4.75155	1
MPOO_1	111.362	4.71278	1
MPOO_2	119.792	4.7852	1
MSNZ_2	111.274	4.71193	1
MSTZ_2	101.498	4.62004	1
NORF_2	128.758	4.85793	1
NOWT_1	121.488	4.79968	1
NOWT_2	112.668	4.72445	1
PEKE_1	98.2424	4.58694	1
PEKE_2	103.294	4.63758	1
PEMB_2	127.322	4.84657	1
POM-_1	94.0576	4.5426	1
POM-_2	102.512	4.62998	1
PUG-_1	113.919	4.73497	1
PUG-_2	108.838	4.68957	1
SHIH_1	100.077	4.60594	1
SHIH_2	98.6926	4.59195	1
SSHP_1	129.009	4.85988	1
SSHP_2	114.715	4.74245	1
TIBS_1	113.575	4.73246	1
TPOO_2	107.343	4.67603	1
WHWT_1	124.919	4.82659	1
WHWT_2	125.937	4.83562	1
Id	Centroid	Size	quartile
ACKR_1	133.741	4.89591	2
AFGH_1	149.194	4.99958	2
AIRT_1	152.734	5.0173	2
AUCD_1	143.28	4.96456	2
AUSS_2	140.38	4.94435	2
BASS_2	147.169	4.99158	2
BEDT_1	138.295	4.92939	2
BEDT_2	134.332	4.90032	2
BULD_1	144.223	4.97136	2
BULD_2	151.863	5.02085	2
CHOW_1	149.836	5.00934	2
CHOW_2	140.235	4.94311	2
CLSD_2	142.323	4.9581	2
COLL_2	143.664	4.96727	2
DACH_1	134.827	4.904	2
DALM_2	145.995	4.98352	2
ECKR_1	134.66	4.90256	2
ENTB_2	149.416	5.00666	2
ESSP_1	152.345	5.02614	2
ESSP_2	136.734	4.91804	2
FSPZ_1	140.915	4.94816	2
FSPZ_2	134.15	4.89896	2
GLGO_2	138.634	4.93184	2
GSHP_2	146.652	4.98794	2
IRTR_1	143.835	4.96867	2
IRTR_2	138.515	4.93075	2
KEES_1	150.66	5.015	2
KERY_2	143.093	4.96337	2
KMLD_1	149.915	5.01007	2
KMLD_2	142.227	4.95735	2
LAKE_1	138.508	4.93093	2
MNTY_1	132.573	4.88713	2
PEMB_1	140.908	4.9481	2
PUMI_2	138.315	4.92953	2
PYSD_1	148.827	5.00279	2
PYSD_2	140.128	4.94255	2
SALU_2	152.02	5.02401	2
SAMO_2	148.322	4.99927	2
SCOT_1	140.095	4.94229	2
SCOT_2	137.994	4.92664	2
SHAR_2	135.92	4.91124	2
SKYE_2	148.324	4.99922	2
SLPD_1	142.994	4.96068	2
SLPD_2	147.931	4.99675	2
SPOO_1	147.694	4.99275	2
SPOO_2	145.04	4.97658	2
SSNZ_2	134.864	4.90356	2
WEIM_2	139.564	4.93852	2
WHIP_2	132.738	4.88835	2
Id	Centroid	Size	quartile
AFGH_2	154.494	5.04016	3
AIRT_2	162.718	5.09139	3
AKTI_1	164.883	5.10501	3
AKTI_2	159.576	5.07247	3
APPH_1	160.506	5.07776	3
APPH_2	160.742	5.07966	3
BELS_1	155.715	5.04803	3
BELS_2	153.93	5.03531	3
BERD_1	158.469	5.06556	3
BERG_2	161.067	5.08182	3
BLDH_2	163.504	5.09677	3
BORD_1	154.458	5.03992	3
BORZ_2	160.993	5.08116	3
BOX-_1	157.153	5.05589	3
BOX-_2	158.293	5.06305	3
BULT_1	161.874	5.08638	3
BULT_2	157.055	5.05614	3
CHBR_2	164.414	5.10221	3
COLL_1	158.355	5.0637	3
CUVA_1	164.613	5.1036	3
DALM_1	156.426	5.05258	3
DOBP_1	166.306	5.11165	3
DOBP_2	160.682	5.07856	3
ENTB_1	163.633	5.09743	3
ESET_1	164.833	5.10493	3
GOLD_1	163.997	5.09956	3
GOLD_2	157.529	5.05909	3
GREY_1	159.972	5.07426	3
GREY_2	159.74	5.07328	3
GSD-_1	163.727	5.09769	3
GSD-_2	164.952	5.10507	3
GSHP_1	157.774	5.06116	3
HUSK_1	160.647	5.07919	3
HUSK_2	159.351	5.07078	3
IBIZ_2	155.875	5.04905	3
IRSE_1	159.549	5.07154	3
IRSE_2	152.747	5.02862	3
LAB-_1	162.758	5.09218	3
LAB-_2	152.476	5.02658	3
LUPU_2	164.886	5.1047	3
PICA_1	162.603	5.09131	3
SAMO_1	154.01	5.03549	3
SGGO_1	155.455	5.04636	3
SKYE_1	156.679	5.0542	3
TURV_1	165.05	5.10625	3
TURV_2	154.125	5.03775	3
VIZS_1	153.881	5.03618	3
WSSD_2	156.325	5.05194	3
Id	Centroid	Size	quartile
AMAL_1	178.426	5.1834	4
AMAL_2	177.004	5.17617	4
BLDH_1	170.191	5.13692	4
BMD-_1	179.646	5.1908	4
BMD-_2	175.007	5.16428	4
BORZ_1	171.656	5.14528	4
BRIA_1	172.908	5.15276	4
BRIA_2	167.373	5.12008	4
CHBR_1	168.602	5.12727	4
CUVA_2	170.079	5.13621	4
DANE_1	201.866	5.30596	4
DANE_2	187.051	5.2302	4
DEER_1	167.55	5.12128	4
FMAS_1	193.673	5.26513	4
GPYR_1	204.013	5.31811	4
GPYR_2	174.628	5.16266	4
GRON_1	171.995	5.14668	4
GSMD_1	182.108	5.2046	4
GSMD_2	178.959	5.18697	4
GSNZ_1	181.914	5.20325	4
GSNZ_2	170.54	5.13897	4
HOVA_1	176.891	5.17486	4
HOVA_2	171.895	5.14663	4
IWOF_1	200.183	5.29902	4
IWOF_2	188.811	5.23997	4
KOMO_1	181.436	5.20067	4
KUVZ_1	185.76	5.22382	4
LAND_1	189.648	5.24517	4
LAND_2	195.144	5.27374	4
LEON_1	195.318	5.27422	4
LEON_2	178.71	5.18573	4
LUPU_1	175.856	5.16774	4
MAST_1	212.521	5.35857	4
MAST_2	188.557	5.2394	4
NEAP_1	190.994	5.25207	4
NEAP_2	183.386	5.21159	4
NEWF_1	194.82	5.27167	4
NEWF_2	174.007	5.15855	4
OES-_1	171.634	5.14536	4
PHAR_2	166.647	5.11588	4
PRES_1	180.572	5.19613	4
RHOD_1	177.137	5.17675	4
RHOD_2	171.927	5.14693	4
ROTT_1	179.734	5.19147	4
ROTT_2	179.54	5.18929	4
STBD_1	201.253	5.30306	4
STBD_2	189.55	5.24251	4
TIBM_1	171.439	5.14326	4
TIBM_2	172.874	5.15053	4
