# Supplementary material for: Variation of BMP3 Contributes to Dog Breed Skull Diversity
Source: PLoS Genet. 2012 Aug 2;8(8):e1002849. doi: 10.1371/journal.pgen.1002849 (PMC3410846; doi:10.1371/journal.pgen.1002849)
Supplement: Table S4 — Associated SNPs and their p-values. SNPs listed are the top 100 associations (PLINK) or those that remained significant following correction for multiple testing (Bonferroni adjustment, GEMMA). Minor allele frequencies are based on 576 dogs from the CanMap dataset for whom we collected phenotype data. SNPs are ordered by strength of association and analysis type (GEMMA). (XLSX) [file pgen.1002849.s010.xlsx]

## Sheet: PLINK Top100
CHR	SNP	BP	Minor allele	Major allele	N missing	MAF	BETA	STAT	P (WALD)	-log10(P)
1	chr1.59832965	59832965	G	A	7	0.1301	0.6584	20.83	5.661e-72	71.2471
1	chr1.59182125	59182125	G	A	33	0.2136	0.629	18.82	3.72e-61	60.4295
1	chr1.59783237	59783237	A	G	6	0.1474	0.6029	18.01	1.051e-57	56.9784
1	chr1.59730029	59730029	T	C	5	0.1524	0.5985	17.82	8.729e-57	56.059
1	chr1.59536208	59536208	A	G	35	0.1165	0.611	17.92	1.138e-56	55.9439
15	chr15.44226659	44226659	A	G	1	0.427	0.5429	15.47	2.184e-45	44.6607
32	chr32.8795512	8795512	T	C	29	0.1069	0.546	15.21	8.034e-44	43.0951
1	chr1.59822761	59822761	A	G	5	0.1909	0.534	15.07	2.041e-43	42.6902
11	chr11.43262247	43262247	G	T	14	0.1254	0.5248	14.59	4.277e-41	40.3689
30	chr30.36101676	36101676	C	G	11	0.09558	0.5228	14.55	5.972e-41	40.2239
32	chr32.8384767	8384767	C	T	28	0.2436	0.5182	14.16	5.544e-39	38.2562
30	chr30.35285717	35285717	A	G	4	0.2876	0.5023	13.87	6.679e-38	37.1753
30	chr30.36342238	36342238	A	G	17	0.1029	0.5013	13.67	6.538e-37	36.1846
10	chr10.11440860	11440860	G	A	4	0.3505	0.4927	13.52	2.623e-36	35.5812
39	chrX.44401786	44401786	C	T	16	0.09318	0.4886	13.19	9.557e-35	34.0197
5	chr5.46025287	46025287	A	G	41	0.1224	0.4962	13.2	1.327e-34	33.8771
30	chr30.35656568	35656568	G	A	1	0.2157	0.4772	13	4.887e-34	33.311
1	chr1.58911546	58911546	T	C	11	0.3982	0.4793	12.96	8.62e-34	33.0645
5	chr5.36476657	36476657	T	G	25	0.3103	0.4811	12.86	2.917e-33	32.5351
1	chr1.59768605	59768605	C	G	8	0.2412	0.4709	12.7	1.087e-32	31.9638
1	chr1.59141647	59141647	A	G	3	0.4921	-0.4596	-12.37	2.711e-31	30.5669
1	chr1.59767640	59767640	G	A	30	0.2335	0.463	12.18	2.354e-30	29.6282
30	chr30.35617588	35617588	A	C	5	0.3835	0.4528	12.11	3.3e-30	29.4815
30	chr30.35611832	35611832	T	C	25	0.2722	0.4573	12.05	7.856e-30	29.1048
10	chr10.11148822	11148822	C	T	7	0.2935	0.4475	11.91	2.309e-29	28.6366
1	chr1.59587050	59587050	A	G	10	0.22	0.4452	11.81	6.606e-29	28.1801
9	chr9.50988217	50988217	A	G	9	0.1393	0.4448	11.8	6.78e-29	28.1688
24	chr24.26359293	26359293	T	C	4	0.4519	0.4427	11.79	7.52e-29	28.1238
5	chr5.37023412	37023412	G	C	7	0.07909	0.4389	11.63	3.462e-28	27.4607
1	chr1.58901153	58901153	G	T	40	0.4487	0.4494	11.63	5.277e-28	27.2776
9	chr9.58189768	58189768	T	C	12	0.4504	-0.4375	-11.53	8.94e-28	27.0487
12	chr12.71796722	71796722	A	G	12	0.1002	0.4371	11.52	1.027e-27	26.9884
24	chr24.26370499	26370499	G	C	4	0.4685	0.4334	11.48	1.353e-27	26.8687
3	chr3.54831916	54831916	A	G	25	0.245	0.4396	11.47	1.94e-27	26.7122
30	chr30.36459108	36459108	A	T	30	0.06777	0.4411	11.46	2.102e-27	26.6774
5	chr5.78904012	78904012	T	C	18	0.2599	0.4358	11.42	2.835e-27	26.5474
5	chr5.47195264	47195264	A	T	3	0.2853	0.4272	11.29	8.044e-27	26.0945
26	chr26.17934251	17934251	T	C	1	0.3165	0.4259	11.27	9.654e-27	26.0153
5	chr5.36901882	36901882	T	C	11	0.07257	0.4281	11.24	1.378e-26	25.8608
28	chr28.7924563	7924563	G	A	5	0.4799	-0.4257	-11.22	1.538e-26	25.813
28	chr28.7924907	7924907	C	T	27	0.4918	-0.427	-11.05	9.651e-26	25.0154
32	chr32.8152258	8152258	A	C	11	0.469	0.4201	10.98	1.45e-25	24.8386
1	chr1.66577581	66577581	G	A	54	0.07854	0.4348	11.01	1.754e-25	24.756
5	chr5.46062303	46062303	G	A	7	0.2742	0.418	10.96	1.808e-25	24.7428
9	chr9.34591369	34591369	A	C	6	0.2272	0.4175	10.95	1.9e-25	24.7212
24	chr24.24921352	24921352	A	G	16	0.1973	0.4208	10.96	1.94e-25	24.7122
9	chr9.50829047	50829047	T	C	40	0.2547	0.4282	10.95	2.635e-25	24.5792
9	chr9.35286704	35286704	C	A	25	0.3457	0.4215	10.89	3.848e-25	24.4148
14	chr14.17205991	17205991	C	T	9	0.2381	0.4145	10.83	5.931e-25	24.2269
23	chr23.39638777	39638777	T	G	10	0.1714	0.4143	10.81	6.953e-25	24.1578
1	chr1.54434151	54434151	G	A	10	0.1352	0.4136	10.79	8.507e-25	24.0702
30	chr30.36239585	36239585	G	T	16	0.283	0.4148	10.77	1.057e-24	23.9759
1	chr1.59438587	59438587	G	A	26	0.4482	-0.4179	-10.77	1.181e-24	23.9278
15	chr15.43829663	43829663	A	G	20	0.375	-0.4147	-10.73	1.618e-24	23.791
39	chrX.86143066	86143066	T	A	10	0.2814	0.4165	10.71	1.736e-24	23.7605
38	chr38.20984180	20984180	A	G	2	0.1646	0.408	10.69	1.965e-24	23.7066
41	chrX.673261	673261	T	G	29	0.1709	0.416	10.68	2.645e-24	23.5776
9	chr9.50829182	50829182	G	A	10	0.386	0.4091	10.65	3.015e-24	23.5207
9	chr9.35292186	35292186	G	A	30	0.2885	0.4158	10.66	3.071e-24	23.5127
24	chr24.39500673	39500673	C	T	6	0.2798	0.4047	10.55	7.179e-24	23.1439
16	chr16.9762360	9762360	C	G	4	0.06381	0.4034	10.52	8.624e-24	23.0643
16	chr16.9780531	9780531	T	C	5	0.06655	0.4037	10.52	8.625e-24	23.0642
26	chr26.17927482	17927482	T	A	3	0.3028	0.3983	10.38	3.149e-23	22.5018
38	chr38.18347613	18347613	C	A	9	0.3333	0.3995	10.36	3.839e-23	22.4158
4	chr4.42111244	42111244	T	C	3	0.06981	0.3976	10.35	3.847e-23	22.4149
1	chr1.59832633	59832633	G	A	18	0.302	0.4023	10.36	4.078e-23	22.3896
1	chr1.59542964	59542964	G	A	41	0.3346	0.41	10.38	4.149e-23	22.3821
4	chr4.91046967	91046967	T	C	8	0.103	0.3988	10.35	4.23e-23	22.3737
5	chr5.32186026	32186026	T	C	7	0.1221	0.3975	10.31	5.614e-23	22.2507
4	chr4.43708718	43708718	G	A	12	0.3351	0.3991	10.32	5.678e-23	22.2458
39	chrX.85867623	85867623	C	T	16	0.2836	0.4069	10.3	6.634e-23	22.1782
9	chr9.50833266	50833266	A	G	16	0.1018	0.3957	10.18	1.975e-22	21.7044
32	chr32.30365964	30365964	C	T	17	0.3292	0.3959	10.18	2.028e-22	21.6929
24	chr24.45921984	45921984	T	C	19	0.2038	0.3965	10.18	2.052e-22	21.6878
4	chr4.43709686	43709686	G	A	23	0.3246	0.3972	10.16	2.427e-22	21.6149
24	chr24.27434511	27434511	T	C	3	0.164	0.3904	10.13	2.623e-22	21.5812
4	chr4.41727770	41727770	A	G	31	0.06514	0.3994	10.15	2.712e-22	21.5667
30	chr30.36074042	36074042	A	G	41	0.2907	0.4022	10.14	3.213e-22	21.4931
33	chr33.25940243	25940243	C	T	5	0.183	0.3896	10.09	3.861e-22	21.4133
17	chr17.8566748	8566748	A	G	12	0.1862	0.3908	10.06	5.086e-22	21.2936
1	chr1.66019474	66019474	T	C	13	0.1075	0.391	10.06	5.207e-22	21.2834
29	chr29.21053448	21053448	G	A	5	0.04991	0.3878	10.03	6.293e-22	21.2011
24	chr24.27396576	27396576	G	A	22	0.1634	0.3931	10.04	6.535e-22	21.1848
10	chr10.68648839	68648839	C	T	14	0.2278	0.389	9.991	9.692e-22	21.0136
26	chr26.11789124	11789124	T	G	15	0.082	0.3893	9.992	9.724e-22	21.0122
18	chr18.25561119	25561119	A	T	38	0.3476	0.3967	10.01	1.009e-21	20.9961
7	chr7.39176835	39176835	A	G	18	0.3853	0.3899	9.983	1.071e-21	20.9702
5	chr5.47566104	47566104	C	T	15	0.2906	0.3881	9.956	1.315e-21	20.8811
4	chr4.41682978	41682978	A	G	9	0.08201	0.3857	9.937	1.487e-21	20.8277
1	chr1.50539992	50539992	G	A	18	0.2814	0.3878	9.922	1.798e-21	20.7452
23	chr23.27159360	27159360	G	A	27	0.1831	0.3907	9.926	1.839e-21	20.7354
4	chr4.42610286	42610286	A	G	9	0.4691	0.3836	9.873	2.579e-21	20.5885
34	chr34.37219039	37219039	A	G	10	0.1104	0.3834	9.858	2.951e-21	20.53
30	chr30.36803751	36803751	T	C	8	0.1963	0.3825	9.848	3.153e-21	20.5013
5	chr5.47163453	47163453	T	C	13	0.1883	0.3826	9.807	4.601e-21	20.3371
1	chr1.58933352	58933352	T	C	49	0.5	-0.3939	-9.82	5.237e-21	20.2809
19	chr19.34848556	34848556	A	G	8	0.3636	0.3804	9.786	5.369e-21	20.2701
3	chr3.54731201	54731201	T	C	1	0.4965	0.378	9.773	5.749e-21	20.2404
1	chr1.72594193	72594193	T	C	8	0.4032	0.3797	9.764	6.449e-21	20.1905
24	chr24.24920078	24920078	C	T	57	0.342	0.3955	9.791	7.02e-21	20.1537

## Sheet: GEMMA
CFA	Base Pair	Minor Allele	Major Allele	N missing	Beta	SE	P (Wald)	-log10(P)	Mixed-model GWAS
1	59832965	G	A	7	-0.0398799	0.00436893	1.17819e-18	17.9288	All breeds (Fig. 2A)
15	44226659	A	G	1	-0.0248214	0.00274184	2.15767e-18	17.666	All breeds (Fig. 2A)
1	59783237	A	G	6	-0.0286844	0.00391637	8.17641e-13	12.0874	All breeds (Fig. 2A)
1	59730029	T	C	5	-0.0278437	0.0038045	8.49472e-13	12.0709	All breeds (Fig. 2A)
10	11440860	G	A	4	-0.0185674	0.00267196	1.00219e-11	10.999	All breeds (Fig. 2A)
X	44401786	C	T	16	-0.0249313	0.00369183	3.5537e-11	10.4493	All breeds (Fig. 2A)
5	32359028	A	G	12	-0.027979	0.00426831	1.24018e-10	9.90652	All breeds (Fig. 2A)
24	26359293	T	C	4	-0.0184571	0.00283645	1.6709e-10	9.77705	All breeds (Fig. 2A)
24	26370499	G	C	4	-0.0178166	0.00283453	6.46773e-10	9.18925	All breeds (Fig. 2A)
1	59822761	A	G	5	-0.0214965	0.00342766	7.03923e-10	9.15247	All breeds (Fig. 2A)
5	37023412	G	C	7	-0.0333014	0.00534666	9.11142e-10	9.04041	All breeds (Fig. 2A)
32	8384767	C	T	28	-0.0191418	0.00315631	2.40014e-09	8.61976	All breeds (Fig. 2A)
15	43829663	A	G	20	0.0157016	0.00264727	5.19697e-09	8.28425	All breeds (Fig. 2A)
5	36901882	T	C	11	-0.0311514	0.00535409	9.88901e-09	8.00485	All breeds (Fig. 2A)
5	32186026	T	C	7	-0.0216829	0.0039104	4.49046e-08	7.34771	All breeds (Fig. 2A)
24	24921352	A	G	16	-0.017181	0.00316003	8.02659e-08	7.09547	All breeds (Fig. 2A)
30	35656568	G	A	1	-0.0168818	0.00312213	9.40763e-08	7.02652	All breeds (Fig. 2A)
5	36476657	T	G	25	-0.0142688	0.00267758	1.42107e-07	6.84738	All breeds (Fig. 2A)
1	59768605	C	G	8	-0.0157847	0.0029713	1.55021e-07	6.80961	All breeds (Fig. 2A)
24	24920624	T	C	10	-0.0137663	0.00266751	3.39439e-07	6.46924	All breeds (Fig. 2A)
24	27434511	T	C	3	-0.0182726	0.00359451	5.02303e-07	6.29903	All breeds (Fig. 2A)
1	58911546	T	C	11	-0.0134722	0.00267204	6.18861e-07	6.20841	All breeds (Fig. 2A)
24	27396576	G	A	22	-0.0182182	0.00362085	6.52054e-07	6.18572	All breeds (Fig. 2A)
10	11312838	T	C	13	0.0139836	0.00279266	7.35755e-07	6.13327	All breeds (Fig. 2A)
1	59832965	G	A	7	-0.028422	0.00383784	4.68949e-13	12.3289	All breeds plus size covariate (Fig. 2B)
5	32359028	A	G	12	-0.025716	0.00356328	1.69516e-12	11.7708	All breeds plus size covariate (Fig. 2B)
24	24921352	A	G	16	-0.0174793	0.0026234	6.31403e-11	10.1997	All breeds plus size covariate (Fig. 2B)
1	59730029	T	C	5	-0.0209154	0.00326219	3.01533e-10	9.52067	All breeds plus size covariate (Fig. 2B)
24	24920624	T	C	10	-0.014031	0.00221695	4.98166e-10	9.30263	All breeds plus size covariate (Fig. 2B)
5	37023412	G	C	7	-0.0281142	0.00450471	8.45885e-10	9.07269	All breeds plus size covariate (Fig. 2B)
1	59783237	A	G	6	-0.0208661	0.00337349	1.17945e-09	8.92832	All breeds plus size covariate (Fig. 2B)
5	36901882	T	C	11	-0.0264772	0.00450672	7.17229e-09	8.14434	All breeds plus size covariate (Fig. 2B)
24	26359293	T	C	4	-0.0137155	0.00242434	2.42887e-08	7.6146	All breeds plus size covariate (Fig. 2B)
1	59822761	A	G	5	-0.0160595	0.00292438	5.99439e-08	7.22226	All breeds plus size covariate (Fig. 2B)
24	26370499	G	C	4	-0.013217	0.00242026	7.06397e-08	7.15095	All breeds plus size covariate (Fig. 2B)
5	36476657	T	G	25	-0.0120677	0.002254	1.24734e-07	6.90402	All breeds plus size covariate (Fig. 2B)
24	24927386	C	T	13	-0.0110673	0.00211227	2.26587e-07	6.64477	All breeds plus size covariate (Fig. 2B)
5	32186026	T	C	7	-0.0171644	0.00330967	2.9824e-07	6.52543	All breeds plus size covariate (Fig. 2B)
X	104724717	C	T	14	-0.0127876	0.00252018	5.26873e-07	6.27829	All breeds plus size covariate (Fig. 2B)
5	37023412	G	C	1	-0.0758202	0.00797102	5.88394e-19	18.2303	50% smallest breeds plus size covariate (Fig. 2C)
5	36901882	T	C	4	-0.0742306	0.00806683	5.74624e-18	17.2406	50% smallest breeds plus size covariate (Fig. 2C)
5	32359028	A	G	6	-0.045881	0.00563731	1.02496e-14	13.9893	50% smallest breeds plus size covariate (Fig. 2C)
24	24921352	A	G	9	-0.0297136	0.00454065	2.53153e-10	9.59662	50% smallest breeds plus size covariate (Fig. 2C)
1	59182125	G	A	15	-0.026101	0.00418048	1.4318e-09	8.84412	50% smallest breeds plus size covariate (Fig. 2C)
32	8795512	T	C	13	-0.0306712	0.00506048	3.98858e-09	8.39918	50% smallest breeds plus size covariate (Fig. 2C)
1	59832965	G	A	3	-0.0303885	0.00511286	7.61479e-09	8.11834	50% smallest breeds plus size covariate (Fig. 2C)
X	104724717	C	T	3	-0.03456	0.0058845	1.11771e-08	7.95167	50% smallest breeds plus size covariate (Fig. 2C)
5	32186026	T	C	3	-0.030319	0.00526106	2.02215e-08	7.69419	50% smallest breeds plus size covariate (Fig. 2C)
1	59730029	T	C	1	-0.0261676	0.00470523	5.85287e-08	7.23263	50% smallest breeds plus size covariate (Fig. 2C)
13	26492600	C	T	2	-0.0325061	0.00597256	1.08053e-07	6.96636	50% smallest breeds plus size covariate (Fig. 2C)
5	34548761	T	C	2	-0.033796	0.00621142	1.08958e-07	6.96274	50% smallest breeds plus size covariate (Fig. 2C)
13	26527418	A	G	2	-0.0447609	0.00835073	1.64376e-07	6.78416	50% smallest breeds plus size covariate (Fig. 2C)
13	26569595	G	A	9	-0.0480236	0.00897894	1.74337e-07	6.75861	50% smallest breeds plus size covariate (Fig. 2C)
1	59783237	A	G	2	-0.0258576	0.00485136	1.91379e-07	6.71811	50% smallest breeds plus size covariate (Fig. 2C)
24	24920624	T	C	7	-0.0182433	0.00351668	3.89036e-07	6.41001	50% smallest breeds plus size covariate (Fig. 2C)
9	50988217	A	G	3	-0.0230218	0.00455713	7.55038e-07	6.12203	50% smallest breeds plus size covariate (Fig. 2C)
24	26359293	T	C	2	-0.0192315	0.00382904	8.69493e-07	6.06073	50% smallest breeds plus size covariate (Fig. 2C)
