# Supplementary material for: Variation of BMP3 Contributes to Dog Breed Skull Diversity
Source: PLoS Genet. 2012 Aug 2;8(8):e1002849. doi: 10.1371/journal.pgen.1002849 (PMC3410846; doi:10.1371/journal.pgen.1002849)
Supplement: Table S5 — FST intervals. For each non-allometric QTL identified by GWAS, a single marker and an interval are listed. Intervals indicate regions of contiguous or nearly contiguous blocks of sliding windows whose FST scores ranked within the top 95th percent of the distribution (FST = 0.06). The best marker within each interval is also listed. Note that CFAX.105 is not listed, as sliding windows for this QTL did not exceed the 95th percent cutoff. (XLSX) [file pgen.1002849.s011.xlsx]

## Sheet: Sheet1
CFA	Best Marker (bp)	Quantile (window)	Start	End	Mb
1	59059650	3.30529e-05	5.85862e+07	60298218	1.71201
5	36476657	0.00282603	3.63619e+07	3.71574e+07	0.795496
24	24920078	0.00079327	2.47223e+07	2.51737e+07	0.451403
30	35678563	0.000594953	34252633	3.51192e+07	0.866537
32	8795512	0.00314003	8159682	8.94088e+06	0.7812
X.44	44401786	0.00771786	4.19086e+07	6.55992e+07	23.6906
9	50829182	0.000892429	5.05422e+07	5.10397e+07	0.49747
13	26481330	0.0093044	2.55631e+07	2.65796e+07	1.01652
