# Supplementary material for: Variation of BMP3 Contributes to Dog Breed Skull Diversity
Source: PLoS Genet. 2012 Aug 2;8(8):e1002849. doi: 10.1371/journal.pgen.1002849 (PMC3410846; doi:10.1371/journal.pgen.1002849)
Supplement: Table S9 — A survey of the BMP3 C/A transversion among 842 dogs and wolves. The BMP3F452L is caused by a C to A transversion at CFA32:8196098. A total of 113 AKC and FCI recognized breeds were genotyped by Sanger sequencing. Breeds and wolves are ordered according to PC1 rank (high = brachycephalic, low = dolichocephalic). Frequencies are given corresponding to derived (“A”) and ancestral (“C”) alleles. With the exception of Scottish Terriers and one Shetland sheepdog, all carriers of the BMP3 missense mutation rank higher than wolves for PC1. Among breeds in our allele frequency survey without morphological information (rows 77–113), six of eight carriers are assumed to be brachycephalic based on breed club descriptions (marked with asterisks). Green shading reflects allele frequencies. (XLSX) [file pgen.1002849.s015.xlsx]

## Sheet: Sheet1
Breed	N	AA	AC	CC	Frequency	PC1 Rank
Pug Dog	60	54	2	4	0.908333	1
Pekingese	32	32	0	0	1	2
French Bulldog	28	28	0	0	1	3
Brussels Griffon	9	9	0	0	1	4
Boston Terrier	38	37	1	0	0.99	5
Shih Tzu	13	4	5	4	0.5	6
Bulldog	12	12	0	0	1	7
Chihuahua	5	1	2	2	0.4	8
Boxer	9	0	0	9	0	9
Cavalier King Charles Spaniel	9	0	1	8	0.06	10
Dogue de Bordeaux	6	0	0	6	0	11
Pomeranian	3	2	0	1	0.67	12
Chinese Crested	1	0	0	1	0	13
Neapolitan Mastiff	4	0	0	4	0	14
Norwich Terrier	3	1	1	1	0.5	15
Mastiff	19	0	3	16	0.08	16
Toy Poodle	3	0	1	2	0.17	17
Chow Chow	2	0	0	2	0	18
Cairn Terrier	8	0	0	8	0	19
West Highland White Terrier	4	0	0	4	0	20
Saint Bernard	12	0	0	12	0	21
Chinese Shar-Pei	5	0	1	4	0.1	22
Dogo Canario	12	0	3	9	0.13	23
Jack Russell Terrier	1	0	1	0	0.5	24
Rottweiler	11	0	0	11	0	25
Italian Greyhound	2	0	0	2	0	26
Pembroke Welsh Corgi	6	3	3	0	0.75	27
Miniature Poodle	4	1	3	0	0.63	28
Beagle	3	0	0	3	0	29
Miniature Schnauzer	3	3	0	0	1	30
Newfoundland	12	0	0	12	0	31
Old English Sheepdog	6	0	0	6	0	32
Entlebucher Mountain Dog	6	0	0	6	0	33
Samoyed	5	0	0	5	0	34
Greater Swiss Mountain Dog	5	0	0	5	0	35
Rhodesian Ridgeback	5	0	2	3	0.2	36
Tibetan Mastiff	7	0	0	7	0	37
Basset Hound	15	0	0	15	0	38
Dachshund	10	0	1	9	0.05	39
Bernese Mountain Dog	6	0	0	6	0	40
Border Collie	5	0	0	5	0	41
English Cocker Spaniel	3	0	1	2	0.17	42
Giant Schnauzer	6	0	0	6	0	43
English Springer Spaniel	6	0	0	6	0	44
Kerry Blue Terrier	1	0	0	1	0	45
Golden Retriever	4	0	0	4	0	46
Leonberger	10	0	0	10	0	47
Alaskan Malamute	2	0	0	2	0	48
Whippet	11	0	0	11	0	49
Chesapeak Bay Retriever	4	0	0	4	0	50
Great Pyrenees	9	0	0	9	0	51
Great Dane	12	0	0	12	0	52
Siberian Husky	4	0	0	4	0	53
Kuvasz	9	0	0	9	0	54
Standard Schnauzer	6	1	2	3	0.33	55
Gray Wolf	26	0	0	26	0	56
German Short-haired Pointer	3	0	0	3	0	57
Standard Poodle	5	0	0	5	0	58
Briard	8	0	0	8	0	59
Bull Terrier	5	0	0	5	0	60
Afghan Hound	4	0	0	4	0	61
German Shepherd Dog	7	0	0	7	0	62
Ibizan Hound	5	0	0	5	0	63
Shetland Sheepdog	13	0	1	12	0.04	64
Doberman Pinscher	15	0	0	15	0	65
Scottish Terrier	3	3	0	0	1	66
Irish Wolfhound	12	0	0	12	0	67
Bloodhound	8	0	0	8	0	68
Pharaoh Hound	1	0	0	1	0	69
Greyhound	5	0	0	5	0	70
Airedale Terrier	2	0	0	2	0	71
Scottish Deerhound	5	0	0	5	0	72
Saluki	13	0	0	13	0	73
Collie	4	0	0	4	0	74
Borzoi	15	0	0	15	0	75
Akbash Dog	2	0	0	2	0	??
Akita	17	0	1	16	0.03	moderately brachycephalic?
American Staffordshire Terrier	4	0	1	3	0.13	moderately brachycephalic?
Anatolian Shepherd	10	0	0	10	0	??
Basenji	3	0	0	3	0	??
Beauceron	10	0	0	10	0	??
Black Russian Terrier	8	0	0	8	0	??
Bouvier des Flandres	2	0	0	2	0	??
Brittany	4	0	1	3	0.13	??
Bullmastiff	16	0	1	15	0.03	giant, brachycephalic
Cane Corso	5	0	0	5	0	moderately brachycephalic?
Cardigan Welsh Corgi	1	0	0	1	0	??
Caucasian Ovtcharka	1	0	0	1	0	??
Clumber Spaniel	2	0	0	2	0	??
Coyote	2	0	0	2	0	??
Dogo Argentino	1	0	0	1	0	moderately brachycephalic?
Flat-coated Retriever	4	0	0	4	0	??
Glen of Imaal Terrier	12	0	2	10	0.08	??
Irish Water Spaniel	6	0	0	6	0	??
Japanese Chin	6	4	0	2	0.67	small, brachycephalic
Kleiner Münsterländer	1	0	0	1	0	??
Levriero Italiano o Meridionale	2	0	0	2	0	??
Mastino Abruzzese	2	0	0	2	0	??
Miniature Bull Terrier	12	0	0	12	0	??
Miniature Pinscher	5	0	0	5	0	??
Otterhound	3	0	0	3	0	??
Papillon	3	0	0	3	0	??
Portuguese Water Dog	3	0	2	1	0.33	??
Red wolf	2	0	0	2	0	??
Silky Terrier	4	0	0	4	0	??
Soft Coated Wheaten Terrier	14	0	3	11	0.11	??
Spinone Italiano	2	0	0	2	0	??
Staffordshire Bull Terrier	5	5	0	0	1	moderately brachycephalic?
Sussex Spaniel	3	1	1	1	0.5	??
Tosa Inu	2	1	0	1	0.5	moderately brachycephalic?
Volpino Italiano	5	0	0	5	0	??
Yorkshire Terrier	3	0	0	3	0	??
